# Supplementary material for: Nanotopography-based engineering of retroviral DNA integration patterns
Source: Royal Society of Chemistry journal article supplement (doi:10.1039/c8nr07029f), 2019-01-01
Supplement: c8nr07029f1.pdf [file c8nr07029f1.pdf]

## Supplementary Information

### Table

**Table S1a. List of genes of which spatially close cis-regulatory elements neighbored MLV integration sites (bare glass substrate, curvature = 0.00  $\mu\text{m}^{-1}$ ).**

| LIST                                                         |
|--------------------------------------------------------------|
| CDK13, AMD1, LCORL, <b>SNX17, RMDN2, ADPRHL1, GNL3, RPRM</b> |

The genes of which spatially close cis-regulatory elements as well as TSSs are located within 5 kb from MLV integration sites (“Cis-TSS group”) are shown in black, and the genes of which spatially close cis-regulatory elements only are located near MLV integration sites (“Cis-only group”) are shown in green and bold.

**Table S1b. List of genes of which spatially close cis-regulatory elements neighbored MLV integration sites (1200-nm bead substrate, curvature = 1.67  $\mu\text{m}^{-1}$ ).**

| LIST                                                                                                                                                                                                                                                                                                                                                                                                                                                                                                                                                                                                                                                                                                                                                                                                                                                                                                                                                                                                                                                                                                                                                                                                                                                                                                                                                                                                                                                                                                                                                                                                                                                                                   |
|----------------------------------------------------------------------------------------------------------------------------------------------------------------------------------------------------------------------------------------------------------------------------------------------------------------------------------------------------------------------------------------------------------------------------------------------------------------------------------------------------------------------------------------------------------------------------------------------------------------------------------------------------------------------------------------------------------------------------------------------------------------------------------------------------------------------------------------------------------------------------------------------------------------------------------------------------------------------------------------------------------------------------------------------------------------------------------------------------------------------------------------------------------------------------------------------------------------------------------------------------------------------------------------------------------------------------------------------------------------------------------------------------------------------------------------------------------------------------------------------------------------------------------------------------------------------------------------------------------------------------------------------------------------------------------------|
| <p>SLC25A13, POMT2, TBC1D23, NEO1, PTPN21, RFX3, ATRX, DNAJA1, TGDS, SEMA6A, CBX5, DSP, ADNP, RS1, FZD3, PPP1R13L, SGTA, SYNGR4, PHF14, SLC1A1, GATA3, SNX25, NUP98, ARMC8, EEF1B2, STAG1, TST, JUND, ZNF304, TRAFD1, SCYL2, RSAD1, MRPL47, CCDC115, MAPK8IP3, FN3KRP, CETN2, RGS10, LAMTOR1, RNF219, GTF3C6, ELK4, LYSMD1, CWC22, FBXW12, ZNF143, MAPK7, MCM7, SRRM2, ANKS3, LRRC45, THOP1, MBOAT1, KCTD13, INHBC, TBL1XR1, EGR3, TOB2, POU3F1, ZNF397, ZSCAN30, C19orf54, HN1, WDR5, ARHGEF12, METTL9, SND1, C5AR1, ZNF583, PRKDC, RUND2A, CYBASC3, MUTED, Q6RUI8, Q9BUK0, <b>HOXA11, AP2B1, CLK1, POLA2, RNH1, NDUFS1, FNIP2, POU1F1, SEMA3C, SNRPA, DDHD2, PEBP1, GANAB, MAEA, THOC5, RBM23, GSTZ1, GSS, PRELID3B, MRGBP, TBL1X, ARL2BP, MCM4, CCDC94, PLGRKT, PALD1, NDUFC1, SNX15, ANAPC15, COQ5, NAA25, RWDD1, FAM120B, PTK7, SLC9A2, RGS2, PIK3R3, STMN1, CD3EAP, HOXB3, ETF1, BICC1, NRN1, MKKS, NCLN, MPST, PARP2, KRBA1, PRPF38A, COL4A2, UBQLN1, BORA, IMP4, APTX, HDGF, C1orf43, GATAD2B, C1orf35, PARP1, RPS27A, CTDSPL, ADAMTS19, NSDHL, SYBU, HAUS6, SLX4IP, TMEM138, INCENP, COMM7, SPATA4, SEC24D, DCP1B, NPAS3, GPR180, ZDHHC7, TRIP12, FBXO36, TRIM11, SLC25A28, PAFAH2, ADIPOR1, RECQL4, LRRC14, TMEM143, CLHC1, SCNM1, ZMYM6, RFC4, GNL3, HNF4G, DEPDC4, C16orf71, PPIB, LMAN2, STRA13, SNTB1, HOXC5, CHRNA7, RPRM, CHID1, C9orf50, CALR, DCTPP1, PLAG1, LCK, AP2A2, LHFP, IRAK1, ZFP36L1, DRG1, HEXIM1, ZNF395, COL4A1, COL25A1, NDUFA4, SF3B3, ADA, HOXA4, FAM114A1, S100A10, MRPS18B, STK19, DXO, PPP1R10, MZT1, AP4M1, ARPC1A, DDOST, MRPS21, CAMKKA, ORC1L, TNRC9, THRAP1, SYBL1, HNRPA1, ATBF1, NLIIF, HNRPU, PB1, UBXD7, C1orf190, GNB2L1, Q9P2B7</b></p> |

The genes of which spatially close cis-regulatory elements as well as TSSs are located within 5 kb from MLV integration sites (“Cis-TSS group”) are shown in black, and the genes of which spatially close cis-regulatory elements only are located near MLV integration sites (“Cis-only group”) are shown in green and bold.

**Table S1c. List of genes of which spatially close cis-regulatory elements neighbored MLV integration sites (600-nm bead substrate, curvature = 3.33  $\mu\text{m}^{-1}$ ).**

| LIST                                                                                                 |
|------------------------------------------------------------------------------------------------------|
| OSGEP, P2RX3, CUTA, ECT2, BCAS2, MBOAT1, KIAA1274, <b>APEX1, NDUFC1, IGF1R, SSRP1, AP3S2, KLHL14</b> |

The genes of which spatially close cis-regulatory elements as well as TSSs located are within 5 kb from MLV integration sites (“Cis-TSS group”) are shown in black, and the genes of which spatially close cis-regulatory elements only are located near MLV integration sites (“Cis-only group”) are shown in green and bold.

**Table S1d. List of genes of which spatially close cis-regulatory elements neighbored MLV integration sites (300-nm bead substrate, curvature = 6.67  $\mu\text{m}^{-1}$ ).**

| LIST                                                                                                                                                                                                                                                                                                                        |
|-----------------------------------------------------------------------------------------------------------------------------------------------------------------------------------------------------------------------------------------------------------------------------------------------------------------------------|
| CDK13, PLOD1, CBX5, DSP, MED13, COPS7A, CUTA, ARMC8, ATG14, UTP3, PIGC, RSAD1, NMRAL1, CWC22, LRR1, ARL4C, GPAA1, ZNF583, MUTED, <b>POLA2, MCM2, RANGAP1, ZC3H7B, HMOX2, FBXW4, RWDD1, RGS2, TMEM138, PAFAH2, ADIPOR1, ISL2, ZNF333, CYB561A3, OSR2, PSIP1, RUVBL1, RPRM, EXOSC4, C9orf50, PPARA, HDAC2, KLHL14, HNRPA1</b> |

The genes of which spatially close cis-regulatory elements as well as TSSs are located within 5 kb from MLV integration sites (“Cis-TSS group”) are shown in black, and the genes of which spatially close cis-regulatory elements only are located near MLV integration sites (“Cis-only group”) are shown in green and bold.

# Figures

## Figure S1.

**a**

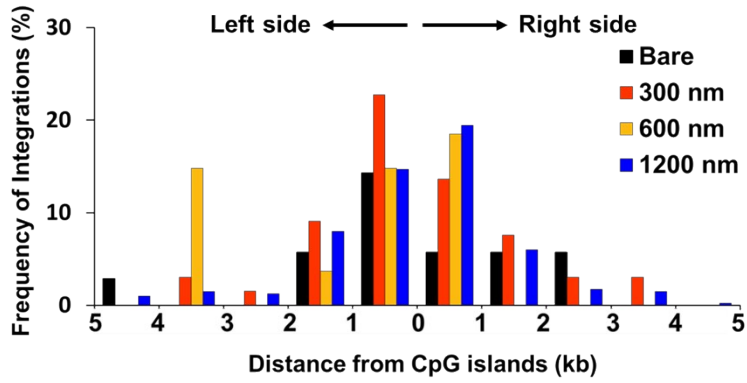

**b**

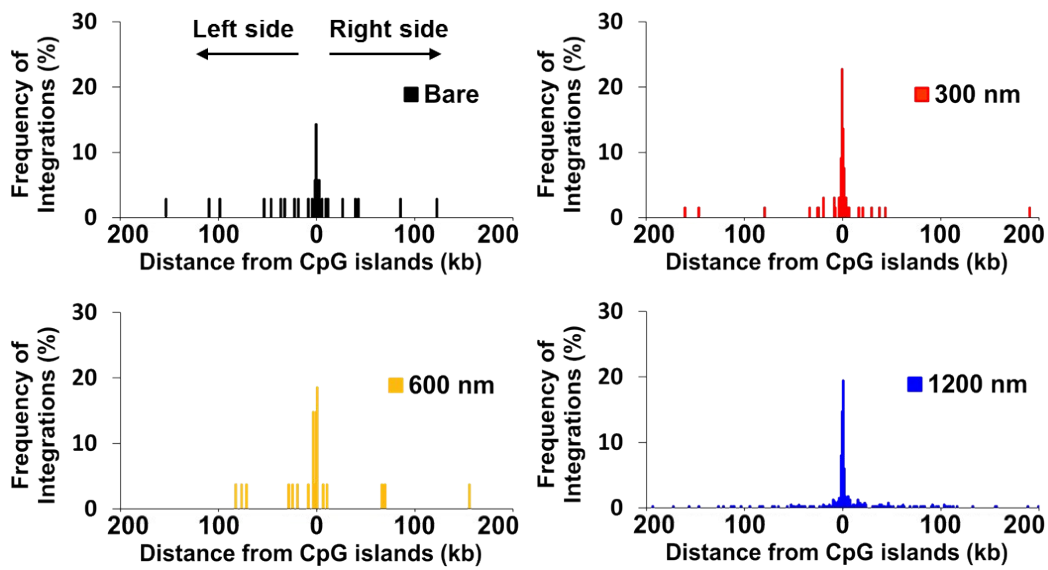

**c**

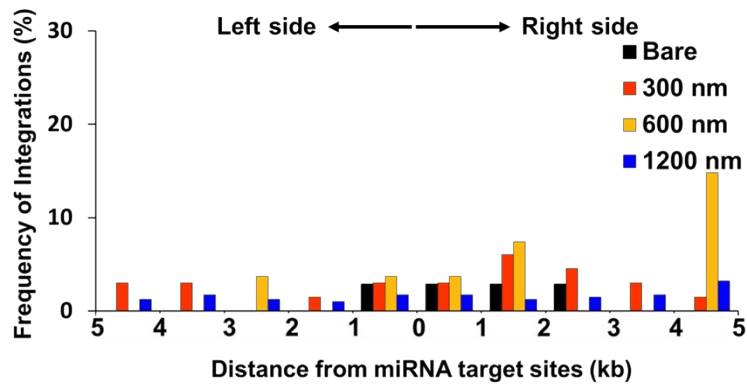

**d**

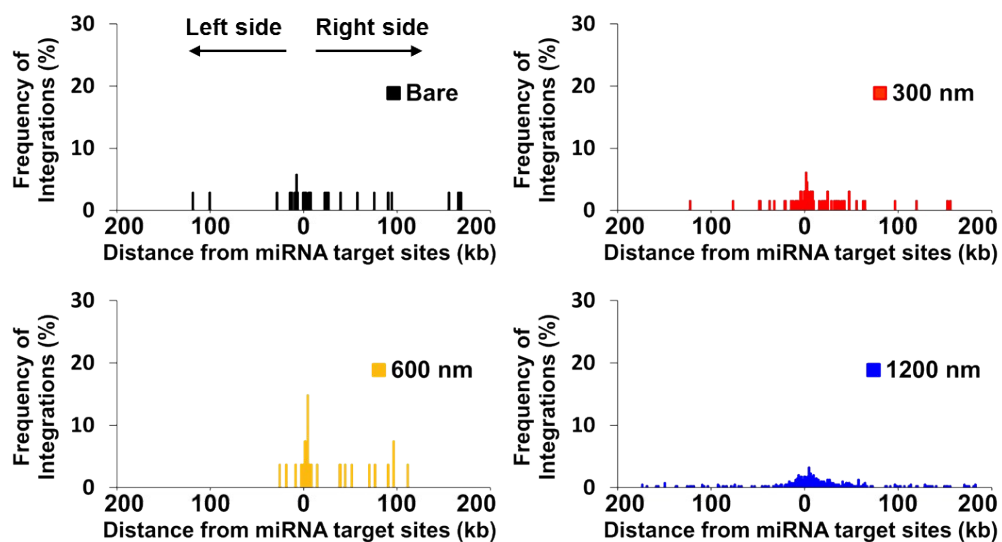

**Figure S1. Spatial distribution of MLV integrations around CpG islands and miRNA target sites.** (a) Within a 5-kb window of CpG islands. (b) Within a 200-kb window of CpG islands. (c) Within a 5-kb window of miRNA target sites. (d) Within a 200-kb window of miRNA target sites.

Figure S2.

a

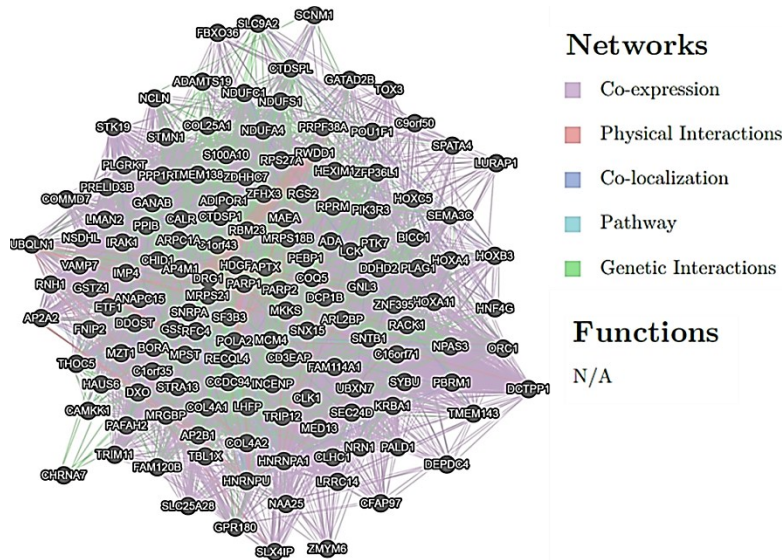

b

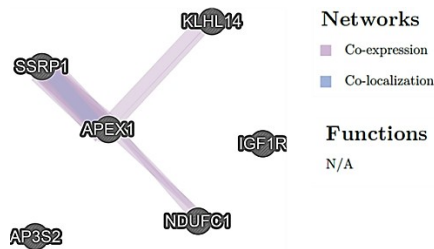

c

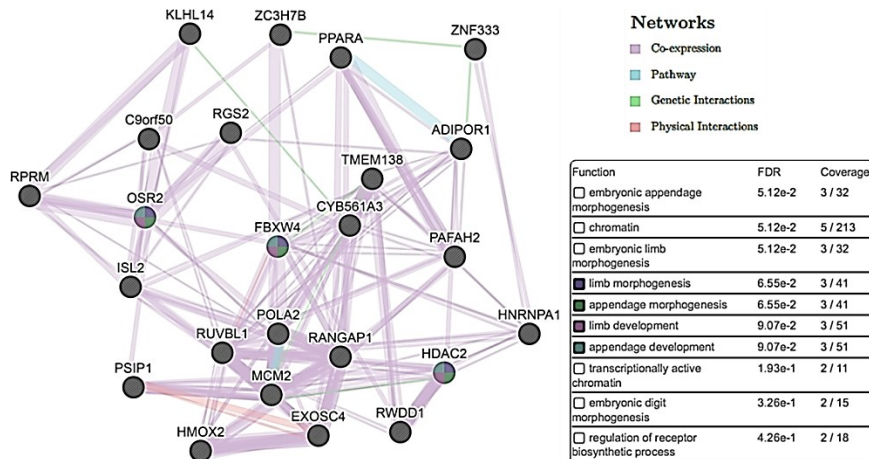

Figure S2. Genetic networks and biological functions for the genes of which spatially close cis-regulatory elements are located within 5 kb from MLV integration sites. Genes shown as nodes are connected when the

corresponding genes are related based on co-expression, co-localization, physical and genetic interactions between them, and involvement in common biological pathways<sup>1, 2</sup>. The nodes for specific genes that are involved in a common biological function are labelled with the corresponding color shown in the box that lists the relevant functions. If a certain gene is involved in multiple biological functions, the gene node is filled with multiple colors corresponding to these functions. (a) For the “Cis-only group” of the 1200-nm bead case (curvature =  $1.67 \mu\text{m}^{-1}$ ). (b) For the “Cis-only group” of the 600-nm bead case (curvature =  $3.33 \mu\text{m}^{-1}$ ). (c) For the “Cis-only group” of the 300-nm bead case (curvature =  $6.67 \mu\text{m}^{-1}$ ).

## References

1. D. Warde-Farley, S. L. Donaldson, O. Comes, K. Zuberi, R. Badrawi, P. Chao, M. Franz, C. Grouios, F. Kazi, C. T. Lopes, A. Maitland, S. Mostafavi, J. Montojo, Q. Shao, G. Wright, G. D. Bader and Q. Morris, *Nucleic Acids Res.*, 2010, **38**, W214-220.
2. K. Zuberi, M. Franz, H. Rodriguez, J. Montojo, C. T. Lopes, G. D. Bader and Q. Morris, *Nucleic Acids Res.*, 2013, **41**, W115-122.
